# Supplementary material for: N-Nitrosamine formation kinetics in wastewater effluents and surface waters
Source: Royal Society of Chemistry journal article supplement (doi:10.1039/c5ew00234f), 2016-01-01
Supplement: c5ew00234f1.pdf [file c5ew00234f1.pdf]

1 **N-Nitrosamine Formation Kinetics in Wastewater Effluents and Surface Waters**

2

3 Jinwei Zhang,<sup>1</sup> David Hanigan,<sup>2</sup> Paul Westerhoff, <sup>2</sup> Pierre Herckes <sup>1,\*</sup>

4

5 **Supplementary Information**

6

7 <sup>1</sup> School of Molecular Sciences, Arizona State University, Tempe, AZ 85287-1604,

8 United States

9 <sup>2</sup> School of Sustainable Engineering and the Built Environment, Arizona State

10 University, Tempe, Arizona 85287-3005, United States

11 \*E-mail: pierre.herckes@asu.edu Telephone: 1-480-965-4497. Fax: 1-480-965-2747.

12

13 Pages: 8

14 Text: 1

15 Figures: 7

16 Table: 1

17

18

19

20

21

22

23

24

25

26

27

28 **Text S1: NDMA formation pathways in chloramination.** NAs could be formed from  
29 primary amines through a nitrosation pathway, these NAs are not stable and decay  
30 rapidly.<sup>1</sup> Secondary amines which form stable secondary NAs have been studied in  
31 greater detail.<sup>2-6</sup> Tertiary amines were also found to be important precursors. Some  
32 tertiary amines (e.g. trimethylamine (TMA)) decay nearly instantaneously and  
33 quantitatively in presence of chlorine to release a secondary amine which forms the  
34 nitrosamine upon chloramination.<sup>7</sup> Mechanistic studies found that nitrosamine yields  
35 from most secondary amines and tertiary amines are similar (i.e., ~0-2%). Some other  
36 tertiary amines (e.g. where one of the alkyl substituents contained an aromatic group in  
37 the  $\beta$ -position to the dimethylamine (DMA) nitrogen such as a benzyl functional group,  
38 or those alkyl substituents containing branched alkyl groups next to the nitrogen of  
39 DMA) have much higher yields of NDMA in chloramination.<sup>8-10</sup> In particular, ranitidine,  
40 a widely used amine-based pharmaceutical, forms NDMA at yields higher than 80%. It  
41 suggests that these tertiary amines form nitrosamines through different pathways.

42 NDMA is thought to be produced in chloraminated drinking waters through three  
43 pathways. Two pathways assume unprotonated DMA undergoes nucleophilic  
44 substitution with either mono- or dichloramine, yielding unsymmetrical  
45 dimethylhydrazine (UDMH) ( $\text{NH}_2\text{Cl}$ ) in or chlorinated UDMH intermediate (Cl-  
46 UDMH) ( $\text{NHCl}_2$ ).<sup>2,5</sup> UDMH is then oxidized by monochloramine to produce NDMA or  
47 Cl-UDMH is oxidized by oxygen to produce NDMA. Based upon competition kinetics,  
48 it has been suggested that monochloramine pathway is negligible compared with  
49 dichloramine pathway. The importance of the two reaction mechanisms remains  
50 debated, with dichloramine producing NDMA concentrations orders of magnitude

51 higher than monochloramine when reacted with amine-containing model compounds.<sup>6</sup>  
52 However, research on suspected NDMA precursors found that compounds with electron  
53 withdrawing groups react preferentially with monochloramine while compounds with  
54 electron donating groups react preferentially with dichloramine.<sup>11</sup> As the molar yield of  
55 NDMA from DMA is low (i.e., <5%), it was suspected that a third pathway, not through  
56 DMA, existed. Recently it was shown that compounds such as ranitidine follow a  
57 different series of reactions involving nucleophilic attack of the amine group in organic  
58 amines. Further reaction involving dissolved O<sub>2</sub> allows for the direct formation of  
59 NDMA and a resulting sister carbocation.<sup>8</sup> When the requisite β-aryl tertiary amine is  
60 present on a parent compound, molar yields of NDMA are always in excess of 20%.<sup>11</sup>  
61 Other NDMA-forming compounds typically have molar conversion of <5% and  
62 therefore β-aryl tertiary amine containing compounds are thought to be of great  
63 importance.  
64

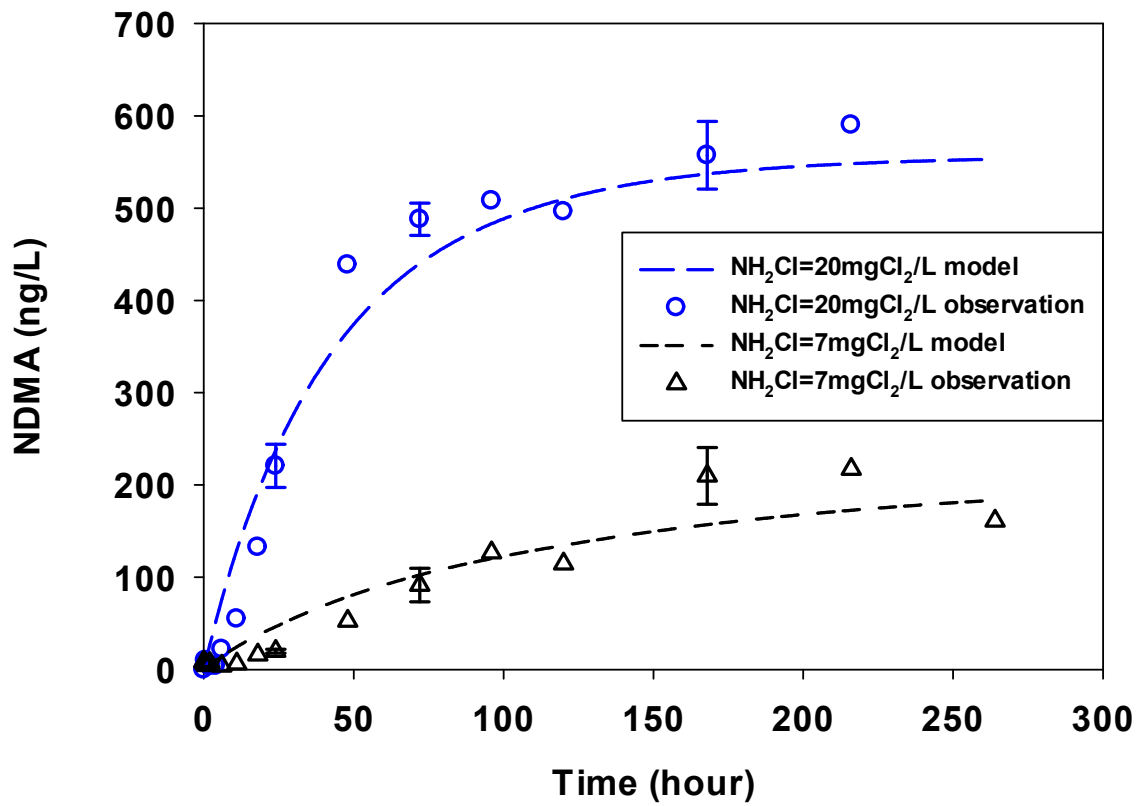

65  
 66 **Fig S1.** NDMA formation observed (symbols) and fitted by Equations 2&3 (line) in  
 67 WW2 at two initial monochloramine doses. (pH=8.0, 20°C)  
 68

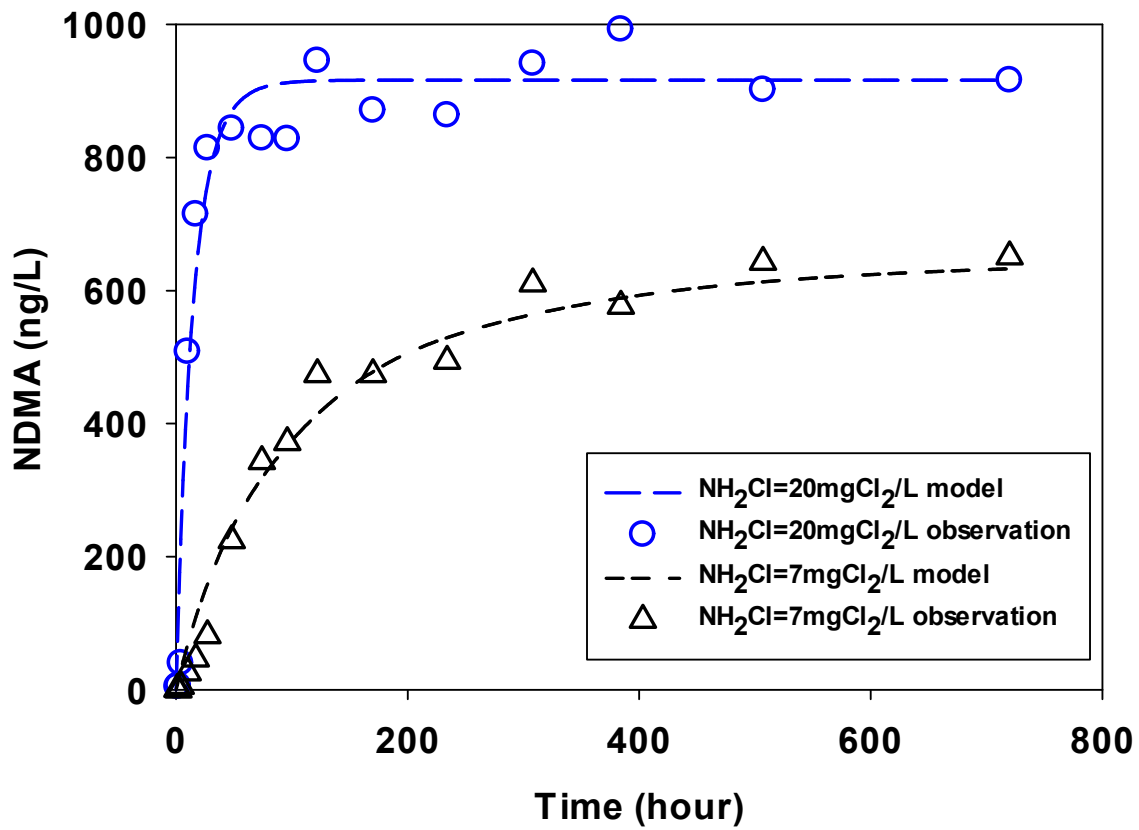

69  
 70 **Fig S2.** NDMA formation observed (symbols) and fitted by Equations 2&3 (line) in  
 71 WW3 at two initial monochloramine doses. (pH=8.0, 20°C)

72  
 73  
 74  
 75  
 76  
 77  
 78

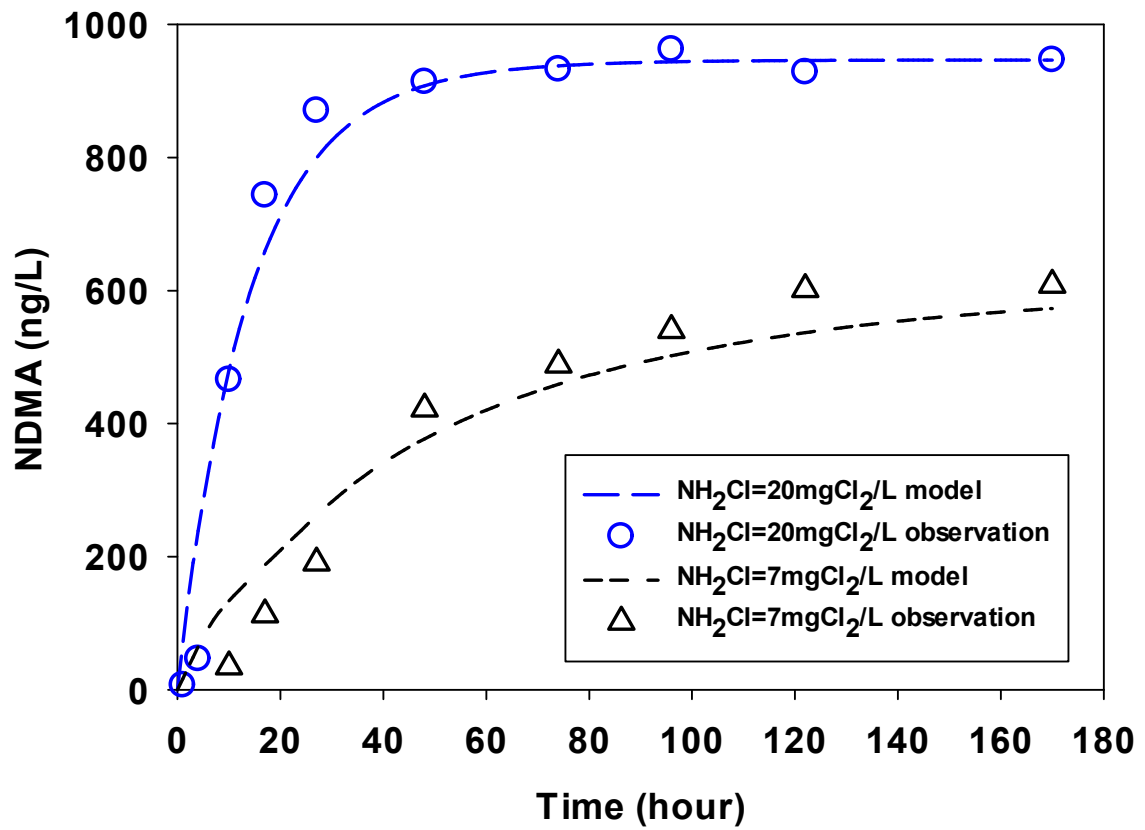

79  
 80 **Fig S3.** NDMA formation observed (symbols) and fitted by Equations 2&3 (line) in  
 81 WW4 at two initial monochloramine doses. (pH=8.0, 20°C)

82  
 83  
 84  
 85  
 86  
 87  
 88  
 89

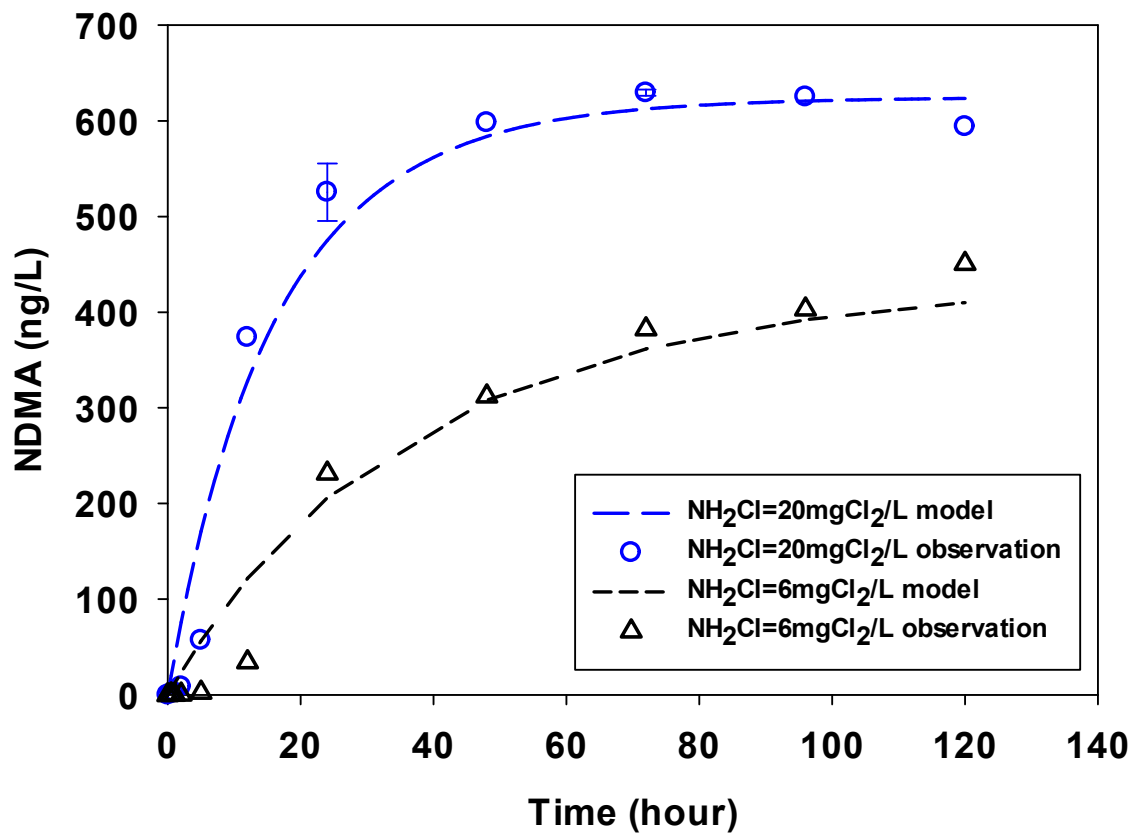

90  
 91 **Fig S4.** NDMA formation observed (symbols) and fitted by Equations 2&3 (line) in  
 92 WW5 at two initial monochloramine doses. (pH=8.0, 20°C)

93  
 94  
 95  
 96  
 97  
 98  
 99  
 100  
 101

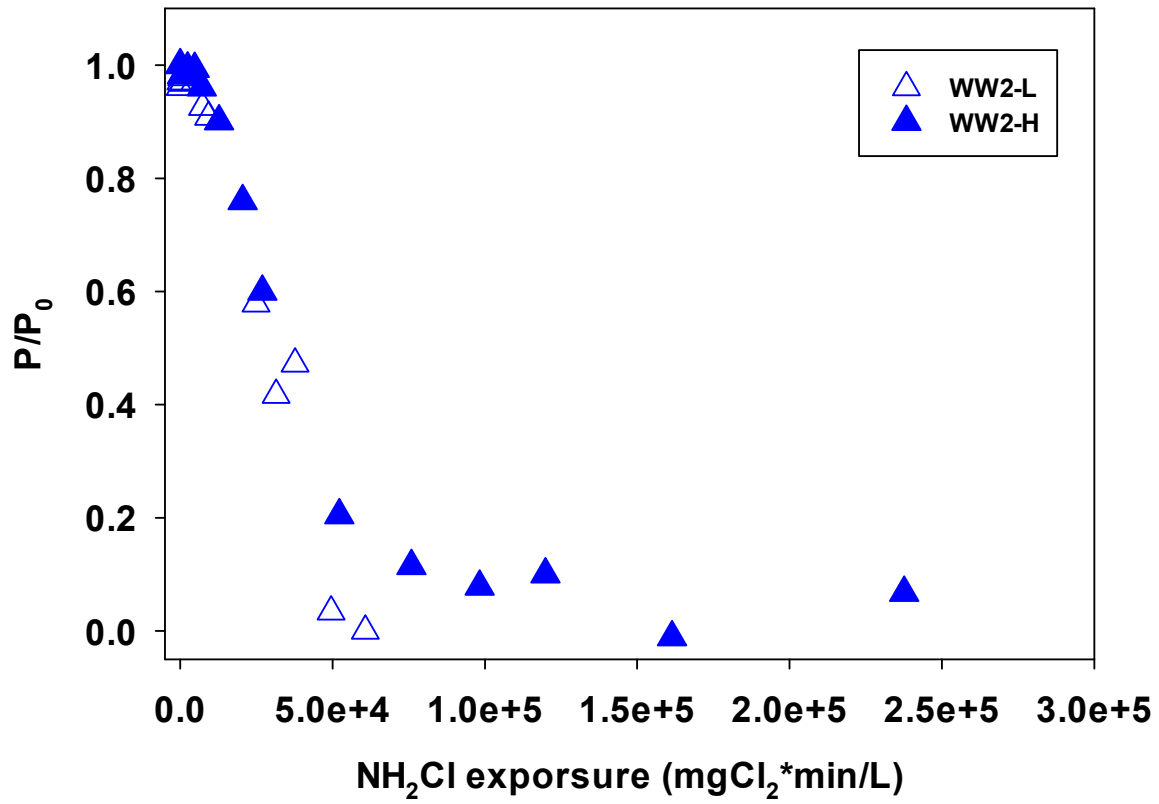

102

103 **Fig S5:** Plots of  $P/P_0$  verses monochloramine exposure for water samples WW2,  
 104 L= lower, H= higher, represent samples with lower or higher  $\text{NH}_2\text{Cl}$  concentration.

105

106

107



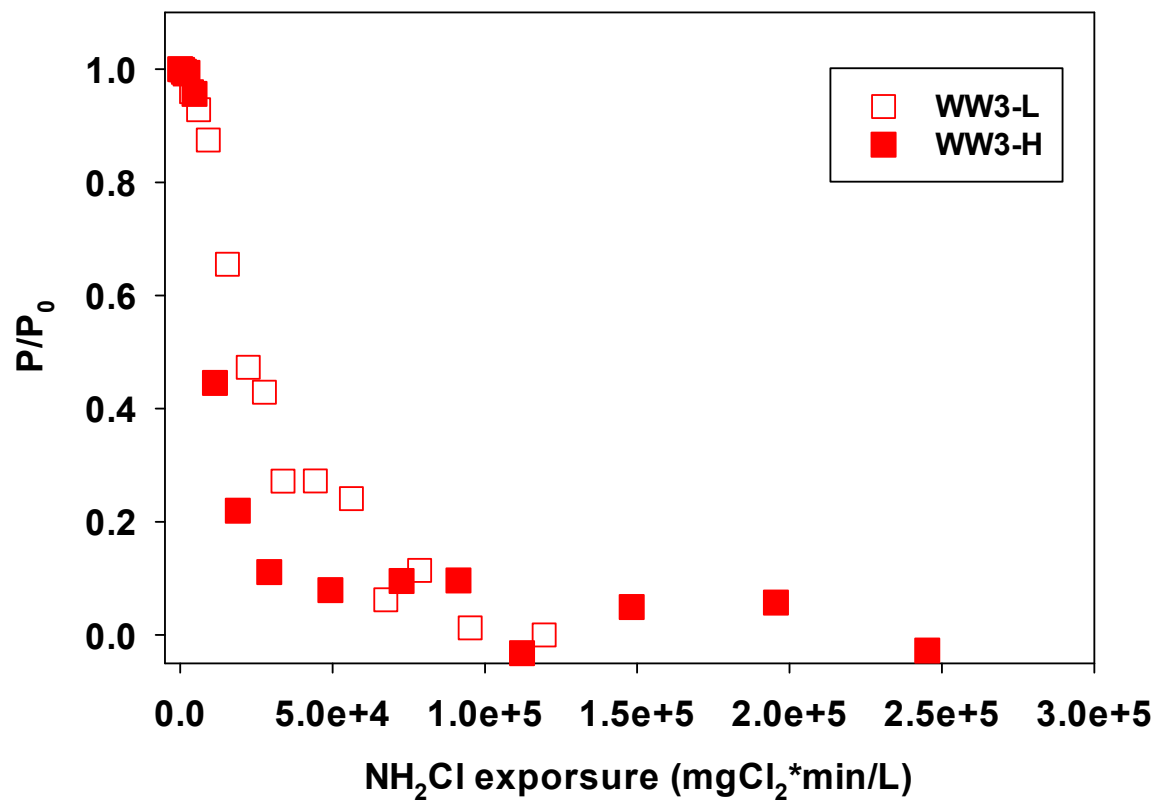

108

109 **Fig S6:** Plots of  $P/P_0$  verses monochloramine exposure for water samples WW3,

110 L= lower, H= higher, represent samples with lower or higher  $\text{NH}_2\text{Cl}$  concentration.

111

112

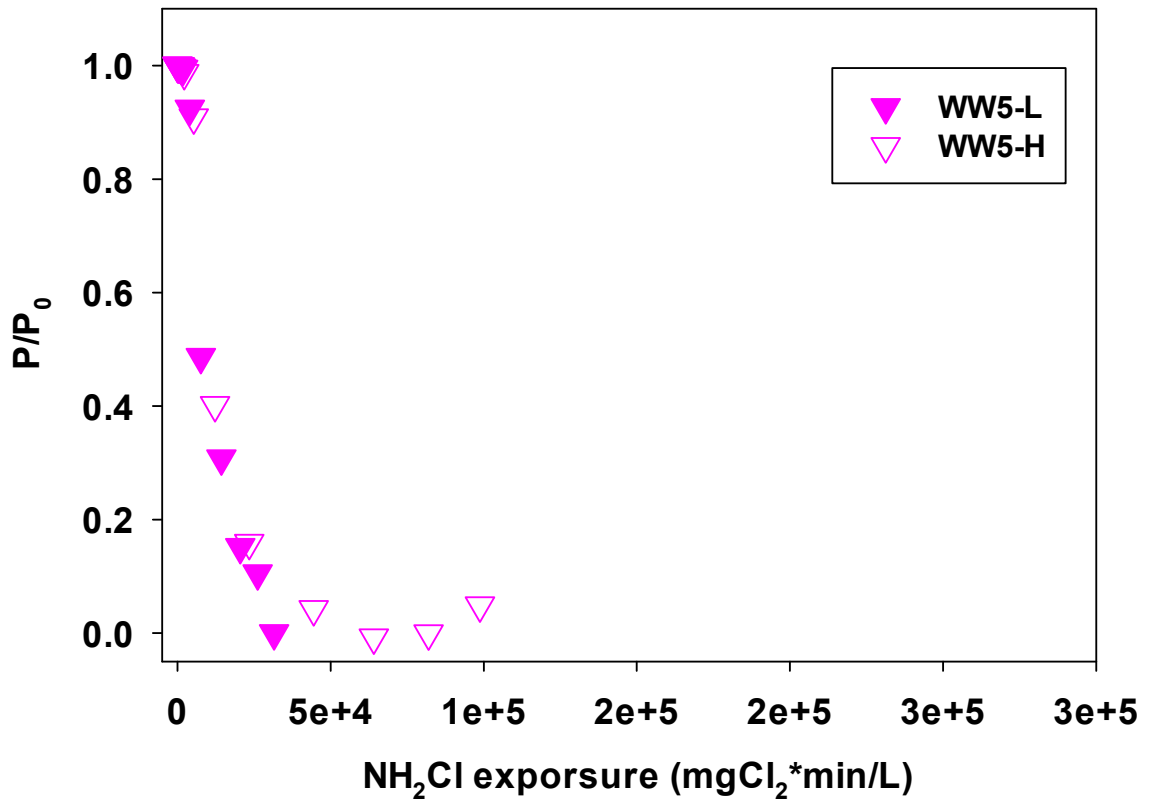

113  
114

115 **Fig S5:** Plots of  $P/P_0$  verses monochloramine exposure for water samples WW5,  
116 L= lower, H= higher, represent samples with lower or higher  $\text{NH}_2\text{Cl}$  concentration.

117  
118  
119  
120  
121  
122  
123  
124

125 **Table S1:** Dose-response curve model parameters

| Sample ID | Upon Monochloramine Addition               |     |                                 |                     |                |
|-----------|--------------------------------------------|-----|---------------------------------|---------------------|----------------|
|           | Monochloramine dose (mgCl <sub>2</sub> /L) | pH  | NDMA <sub>max</sub> (nM) [ng/L] | k(h <sup>-1</sup> ) | R <sup>2</sup> |
| WW1       | 18                                         | 8.2 | 6 [450]                         | 0.03                | 0.99           |
|           | 6                                          |     | 4 [280]                         | 0.02                | 0.91           |
| WW2       | 20                                         | 8   | 7 [520]                         | 0.05                | 0.98           |
|           | 7                                          |     | 2 [200]                         | 0.01                | 0.96           |
| WW3       | 20                                         | 8   | 12[920]                         | 0.17                | 0.97           |
|           | 7                                          |     | 9[620]                          | 0.02                | 0.96           |
| WW4       | 20                                         | 8   | 12[920]                         | 0.13                | 0.99           |
|           | 7                                          |     | 8[580]                          | 0.03                | 0.98           |
| WW5       | 20                                         | 8   | 8[600]                          | 0.18                | 0.99           |
|           | 6                                          |     | 5.5[380]                        | 0.04                | 0.98           |
| SW1       | 36                                         | 8   | 0.7[53]                         | 0.01                | 0.98           |
|           | 12                                         |     | 0.4[35]                         | 0.01                | 0.93           |
| GW1       | 20                                         | 8   | 0.2[16]                         | 0.04                | 0.93           |
|           | 7                                          |     | 0.2[11]                         | 0.07                | 0.95           |

126

127

128

129

130

131

132

133

134

135

136

137

138

139

140 **Reference:**

- 141 1. J. H. Ridd, *Q. Rev. Chem. Soc.*, 1961,15, 418-441.
- 142 2. J. Choi and R . L. Valentine, *Water Res.*, 2002, 36, 817-824.
- 143 3. W. A. Mitch and D. L. Sedlak, *Environ. Sci. Technol.*, 2002, 36, 588-595.
- 144 4. I. M. Schreiber and W. A. Mitch, *Environ. Sci. Technol.*, 2006, 40, 3203-3210.
- 145 5. I. M. Schreiber and W. A. Mitch, *Environ. Sci. Technol.*, 2006, 40, 6007-6014.
- 146 6. A.Shah and W. A. Mitch, *Environ. Sci. Technol.*, 2012, 46, 119-131.
- 147 7. W. A. Mitch and I. M. Schreiber, *Environ. Sci. Technol.*, 2008, 42, 4811-4817.
- 148 8. J. Le Roux, H. Gallard and J. P. Croue, *Environ. Sci. Technol.*, 2012, 46, 11095-  
149 11103.
- 150 9. R. Shen and S. A. Andrews, *Water Res.*, 2011, 45, 944-952.
- 151 10. R. Shen and S. A. Andrews, *Water Res.*, 2011, 45, 5687-5694.
- 152 11. M. Selbes, D. Kim, N. Ates and T. Karanfil, *Water Res.*, 2013, 47, 945-953.
